# Supplementary material for: A noncanonical glycoprotein H complex enhances cytomegalovirus entry
Source: PubMed Central journal article supplement — bioRxiv. 2024 Oct 13:2024.10.13.617647. Preprint. [Version 1] doi: 10.1101/2024.10.13.617647 (PMC11482907; doi:10.1101/2024.10.13.617647), 2024-10-13
Supplement: media-1.pdf [file media-1.pdf]

**Extended Data Table 1.** Primary antibodies and working dilutions used for each application.

| Antibody Name or Target  | Animal Source | Mono-/ Polyclonal       | CloneID or Rabbit ID | Vendor or Source                                    | Cat. No.  | Dilutions for Applications |        |        |        |
|--------------------------|---------------|-------------------------|----------------------|-----------------------------------------------------|-----------|----------------------------|--------|--------|--------|
|                          |               |                         |                      |                                                     |           | IP                         | WB     | IF     | FC     |
| DYKDDDDK (aka FLAG) tag  | Rb            | monoclonal              | D6W5B                | Cell Signaling Technology                           | 14793     | 1:50                       | 1:1000 |        |        |
| FLAG tag                 | Ms            | monoclonal              | M2                   | Sigma Aldrich                                       | F1804     |                            | 1:1000 | 1:1000 |        |
| ECS (DYKDDDDK) Tag       | Rb            | Monoclonal              | BLRE00G              | Bethyl                                              | A191-100  | 1:100                      |        |        |        |
| Myc-tag                  | Ms            | monoclonal              | 9B11                 | Cell Signaling Technology                           | 2276S     | 1:250                      | 1:1000 | 1:8000 |        |
| His-tag                  | Ms            | monoclonal              | J099B12              | BioLegend                                           | 652502    |                            | 1:1000 |        |        |
| Strep-tag                | Ms            | monoclonal              | GT661                | GeneTex                                             | GTX628900 |                            | 1:1000 |        |        |
| HA-tag                   | Ms            | monoclonal              | J095G46              | Biolegend                                           | 362605    |                            |        |        | 5µg/ml |
| IE1                      | Ms            | monoclonal              | 1B12                 | Thomas Shenk, Princeton University                  | n/a       |                            | 1:200  | 1:200  |        |
| UL141 (residues 308-338) | Rb            | polyclonal anti-peptide | 14501                | Pacific Immunology                                  | n/a       |                            | 1:1000 | 1:1000 |        |
| UL141                    | Ms            | monoclonal              | M550.2               | Dr. Wilkinson, Cardiff Univ                         | n/a       |                            | 1:1000 |        | 5µg/ml |
| gB                       | Ms            | monoclonal              | 27-156               | William J. Britt, University of Alabama, Birmingham | n/a       |                            | 1:1000 | 1:800  |        |
| gL (residues 258-278)    | Rb            | polyclonal anti-peptide | 11684                | Pacific Immunology                                  | n/a       |                            | 1:1000 |        |        |
| MCP                      | Ms            | monoclonal              | 28-4                 | William J. Britt, University of Alabama, Birmingham | n/a       |                            | 1:400  |        |        |
| UL148 (residues 263-285) | Rb            | polyclonal anti-peptide | 9220                 | Pacific Immunology                                  | n/a       |                            | 1:1000 |        |        |
| gH                       | Ms            | monoclonal              | AP86                 | William J. Britt, University of Alabama, Birmingham | n/a       |                            | 1:1000 | 1:800  |        |
| gH                       | Ms            | monoclonal              | 11-1-1               | Dr. Britt, AL Birmingham                            | n/a       |                            |        |        | 1:200  |
| Calnexin                 | Rb            | monoclonal              | C5C9                 | Cell Signaling Technology                           | 2679S     |                            | 1:1000 | 1:1000 |        |

Key: Rb: Rabbit; Ms: Mouse
