# Supplementary material for: A noncanonical glycoprotein H complex enhances cytomegalovirus entry
Source: PubMed Central journal article supplement — bioRxiv. 2024 Oct 13:2024.10.13.617647. Preprint. [Version 1] doi: 10.1101/2024.10.13.617647 (PMC11482907; doi:10.1101/2024.10.13.617647), 2024-10-13
Supplement: media-2.pdf [file media-2.pdf]

**Extended Data Table 2. Oligonucleotide Primers for HCMV BAC recombineering procedures.**

| Primer Name         | Purpose                                                                                                                            | PCR template                                                                                                                                                                                                  | BAC targeted for modification                                           | Sequence, 5'-3'                                                                                                  |
|---------------------|------------------------------------------------------------------------------------------------------------------------------------|---------------------------------------------------------------------------------------------------------------------------------------------------------------------------------------------------------------|-------------------------------------------------------------------------|------------------------------------------------------------------------------------------------------------------|
| UL141 repair Kan Fw | Repair UL141 frameshift in HCMV strain TB40/E                                                                                      | I-SceI-AphAI (KanR) sequence (PMID: 16526409)                                                                                                                                                                 | TB40-BAC4 (PMID: 18198366) or derivatives thereof                       | GTCGCCGGCGCCGGTGTGG<br>TCGCCGAGGGAGAGCAAGTTA<br>CCATCCCCTGCACGGTCATAG<br>GGATAACAGGGTAATCGATTT                   |
| UL141 repair Kan Rv |                                                                                                                                    |                                                                                                                                                                                                               |                                                                         | CCATGGGCCAGGAGTGTGTCA<br>TGACCGTGCAGGGGATGGTAA<br>CTTGCTCTCCCTCGGCGAGCC<br>AGTGTTACAACCAATTAACC                  |
| UL141_FLAG_Kan_Fw   | Add FLAG epitope tag to the C-terminus of UL141                                                                                    | I-SceI-AphAI (KanR) sequence (PMID: 16526409)                                                                                                                                                                 | TB40-BAC4 (PMID: 18198366), TR3 (PMID: 31848362) or derivatives thereof | GACTTACGATAGTTACCCCGGT<br>GTTAAAAAGATGAAGAGGGAC<br>TACAAGGATGACGACGATAAGT<br>GAGAACATAGGGATAACAGGG<br>TAATCGATTT |
| UL141_FLAG_Kan_Rv   |                                                                                                                                    |                                                                                                                                                                                                               |                                                                         | TTTTTTAACATGTTATTTTTTTTATTT<br>TATGCGTGTTCCTCACTTATCGTCG<br>TCATCCTTGTAGTCCCTCTTCAGC<br>CAGTGTTACAACCAATTAACC    |
| Xfer_UL141_FLAG_Fw  | Replace UL131-UL128 with UL141-FLAG CDS                                                                                            | TR3-UL141-FLAG-Kan-integrate (intermediate in BAC recombineering)                                                                                                                                             | AD169rv (Hobom et al., 2006, PMID: 10933677)                            | ATGATGTCTCATAATAAAGCTTTCT<br>TTCTCAGTCTGCAACAGCGTCTC<br>TGCGAAAAAGG                                              |
| Xfer_UL141_FLAG_Rv  |                                                                                                                                    |                                                                                                                                                                                                               |                                                                         | CGACAGAAATCTCAAACCGCGTAT<br>TTCGGACAAAACACACCAACAC<br>GCCATTCAATCC                                               |
| EGFP_in_Kan_Fw      | To produce an I-SceI-AphAI-disrupted eGFP locus in a GFP+ TB40-BAC4 derivative to enable transfer of the eGFP locus to the TR3 BAC | I-SceI-AphAI (KanR) sequence (PMID: 16526409)                                                                                                                                                                 | TB40E_5: a TB40-BAC-4 derivative expressing eGFP (PMID: 22241980)       | GGCAACTACAAGACCCGCGCCG<br>AGGTGAAGTTCGAGGGCGACAC<br>CCTGGTGAACCGCATCTAGGGAT<br>AACAGGGTAATCGATTT                 |
| EGFP_in_Kan_Rv      |                                                                                                                                    |                                                                                                                                                                                                               |                                                                         | AAGTCGATGCCCTTCAGCTCGAT<br>GCGGTTACCAGGGTGTGCCCC<br>TCGAACTTACCTCGGCCAGTGT<br>TACAACCAATTAACC                    |
| Us34CT_Fw           | Transplant the AphAI-disrupted eGFP expression cassette from TB40-BAC4 GFP to TR3                                                  | TB40E_5_eGFP-I-SceI-AphAI, a TB40-BAC-4 derivative expressing eGFP (PMID: 22241980) in which the eGFP locus is disrupted by an I-SceI-AphAI sequence that can later be removed via en passant BAC mutagenesis | TR3 (PMID: 31848362)                                                    | TGTTCCCTCCTTGAACCGC                                                                                              |
| TRS1/Us34           |                                                                                                                                    |                                                                                                                                                                                                               |                                                                         | CTCCGCATCCCACCATTCTT                                                                                             |
