# Supplementary material for: A noncanonical glycoprotein H complex enhances cytomegalovirus entry
Source: PubMed Central journal article supplement — bioRxiv. 2024 Oct 13:2024.10.13.617647. Preprint. [Version 1] doi: 10.1101/2024.10.13.617647 (PMC11482907; doi:10.1101/2024.10.13.617647), 2024-10-13
Supplement: media-3.pdf [file media-3.pdf]

**Extended Data Table 3. Cryo-EM data collection, refinement, and validation.**

|                                                           | gH/UL116/UL141 3-mer | gH/UL116 Local               |
|-----------------------------------------------------------|----------------------|------------------------------|
| <b>Data Collection</b>                                    |                      |                              |
| Microscope                                                |                      | Titan Krios G3               |
| Voltage (keV)                                             |                      | 300                          |
| Detector                                                  |                      | Gatan K3                     |
| Energy Filter                                             |                      | GIF Bioquantum               |
| Magnification (nominal/calibrated)                        |                      | 130,000x                     |
| Data acquisition software                                 |                      | EPU                          |
| Exposure (s)                                              |                      | 2.5                          |
| Total electron exposure (e <sup>-</sup> /Å <sup>2</sup> ) |                      | ~50                          |
| Number of frames per micrograph                           |                      | 50                           |
| Pixel size (raw/final) (Å)                                |                      | 0.66/1.32                    |
| Defocus range (µm)                                        |                      | -0.6 to -2.5                 |
| Micrographs collected (no.)                               |                      | 14,075                       |
| <b>Reconstruction</b>                                     |                      |                              |
| Image processing package                                  | CryoSPARC/Relion     | CryoSPARC                    |
| Number of particles (unique/symmetry expanded)            | 119,525 / -          | 56,333 / 112,666             |
| Symmetry imposed                                          | C2                   | C1 from symmetry expanded C2 |
| Resolution (Å)                                            |                      |                              |
| FSC 0.143 (unmasked/masked)                               | 4.2/3.5              | 5.4/6.3                      |
| Local resolution range (min/median/max)                   | 2.9/4.5/35.1         | 3.7/5.1/7.4                  |
| <b>Model composition</b>                                  |                      |                              |
| Non-hydrogen Atoms                                        | 29,158               | 9,037                        |
| Protein Residues                                          | 1802                 | 546                          |
| Ligands                                                   | BMA: 2, NAG: 16      | BMA: 1, NAG: 13              |
| <b>Model vs. Data</b>                                     |                      |                              |
| CC (mask)                                                 | 0.76                 | 0.58                         |
| CC (box)                                                  | 0.82                 | 0.72                         |
| CC (peaks)                                                | 0.69                 | 0.38                         |
| CC (volume)                                               | 0.76                 | 0.60                         |
| Mean CC for Ligands                                       | 0.77                 | 0.80                         |
| <b>Model Refinement</b>                                   |                      |                              |
| Model-map FSC 0.5 (unmasked/masked)                       | 3.97/3.82            | 7.45/7.34                    |
| Model-map FSC 0.143 (unmasked/masked)                     | 3.55/3.49            | 5.84/5.73                    |

|                          |        |        |
|--------------------------|--------|--------|
| RMSD from ideal geometry |        |        |
| Bond length (Å)          | 0.004  | 0.003  |
| Bond angles (°)          | 0.611  | 0.780  |
| Ramachadran plot         |        |        |
| Outliers (%)             | 0.00   | 0.00   |
| Allowed (%)              | 4.82   | 7.25   |
| Favored (%)              | 95.18  | 92.75  |
| MolProbity score         | 1.71   | 2.08   |
| Rotamer Outliers (%)     | 0.56   | 0.21   |
| Clashscore (all atoms)   | 6.77   | 12.88  |
| C-beta Outliers (%)      | 0.00   | 0.00   |
| CaBLAM Outliers (%)      | 2.20   | 4.58   |
| Refinement package       | Phenix | Phenix |
